# Supplementary material for: An Overview of Physiologically-Based Pharmacokinetic Models for Forensic Science
Source: MDPI journal article supplement (doi:10.3390/toxics11020126), 2023-01-28
Supplement: s1 [file s1]

Supplementary Information to the manuscript by Fairman et al.

**Table S1.** Reporting a list of chemicals for which a PBPK model is available, reporting are the administration route, model compartments Simulation software used and reference/DOI. The information was extracted from the Thompson (2021, DOI: 10.1177/02611929211060264) database on PBPK models.

| Chemical Name | Sex/<br>Life stage | Administration Route        | Compartments or related information                                                                                                                       | Simulation Software | Reference                                               | DOI                        |
|---------------|--------------------|-----------------------------|-----------------------------------------------------------------------------------------------------------------------------------------------------------|---------------------|---------------------------------------------------------|----------------------------|
| alfentanil    | From birth         | Intravenous infusion        |                                                                                                                                                           | Simcyp              | Abduljalil et al, 2019, Clin Pharmacokinet, 59, 501-518 | 10.1007/s40262-019-00827-4 |
| alfentanil    |                    | Intravenous bolus injection | adipose, brain, caecum, colon, duodenum, gut, heart, kidney, liver, lung, jejunum, ileum, marrow, muscle, reproductive organs, rest of body, skin, spleen | GastroPlus          | Baneyx et al., 2014, Eur J Pharm Sci, 56, 1-15          | 10.1016/j.ejps.2014.02.002 |
| alfentanil    |                    | Oral bolus                  | adipose, brain, caecum, colon, duodenum, gut, heart, kidney, liver, lung, jejunum, ileum, marrow, muscle, reproductive organs, rest of body, skin, spleen | GastroPlus          | Baneyx et al., 2014, Eur J Pharm Sci, 56, 1-15          | 10.1016/j.ejps.2014.02.002 |

|                      |                 |                             |                                                                                                                |            |                                                         |                                                                                                         |
|----------------------|-----------------|-----------------------------|----------------------------------------------------------------------------------------------------------------|------------|---------------------------------------------------------|---------------------------------------------------------------------------------------------------------|
| <b>buprenorphine</b> |                 | Intravenous bolus injection | lung, adipose, bone, brain, heart, kidney, muscle, liver, portal vein, pancreas, spleen, gut, venous, arterial | Simcyp     | Kalluri et al, 2017, Br J Clin Pharmacol, 83, 2458-2473 | 10.1111/bc p.13368                                                                                      |
| <b>buprenorphine</b> |                 | Buccal                      | lung, adipose, bone, brain, heart, kidney, muscle, liver, portal vein, pancreas, spleen, gut, venous, arterial | Simcyp     | Kalluri et al, 2017, Br J Clin Pharmacol, 83, 2458-2473 | 10.1111/bc p.13368                                                                                      |
| <b>buprenorphine</b> |                 | Dermal injection            | central compartment, periphery                                                                                 | Simcyp     | Liu and Gobburu, 2018, J Pharm Sci, 107, 942-948        | 10.1016/j.x phs.2017.1 0.035                                                                            |
| <b>buprenorphine</b> |                 | Intravenous bolus injection | central compartment, periphery                                                                                 | Simcyp     | Liu and Gobburu, 2018, J Pharm Sci, 107, 942-948        | 10.1016/j.x phs.2017.1 0.035                                                                            |
| <b>carfentanil</b>   | Male/adult      | iv-administered             |                                                                                                                | GastroPlus | Feasel et al. 2018                                      | <a href="https://apps.dtic.mil/sti/pdfs/AD1060142.pdf">https://apps.dtic.mil/sti/pdfs/AD1060142.pdf</a> |
| <b>cocaine</b>       | Male            | Intravenous bolus injection | lung, brain, fat, bone, heart, muscle, kidney, skin, spleen, intestine, liver, venous, arterial                | MATLAB     | Bravo-Gómez et al, 2019, Toxicol Res (Camb), 8, 432-446 | 10.1039/c8 tx00309b                                                                                     |
| <b>cocaine</b>       | Adult (typical) | Intravenous bolus injection |                                                                                                                | GastroPlus | Cheng et al, 2019, ACS Chem                             | 10.1021/ac schemneu                                                                                     |

|                |            |                        |                                                                                                              |       |                                                                      |                              |
|----------------|------------|------------------------|--------------------------------------------------------------------------------------------------------------|-------|----------------------------------------------------------------------|------------------------------|
|                |            |                        |                                                                                                              |       | Neurosci, 10, 3486-3499                                              | ro.9b00109                   |
| <b>ethanol</b> |            | Inhalation             | lung, fat, liver, brain, well/rapidly perfused, poorly/slowly perfused                                       | acsIX | Crowell et al., 2015, Regul Toxicol Pharmacol, 73, 452-62            | 10.1016/j.yrtph.2015.07.021  |
| <b>ethanol</b> |            | Metabolism from parent | lung, fat, liver, brain, well/rapidly perfused, poorly/slowly perfused                                       | acsIX | Crowell et al., 2015, Regul Toxicol Pharmacol, 73, 452-62            | 10.1016/j.yrtph.2015.07.021  |
| <b>ethanol</b> |            | Inhalation             | bone marrow, fat, gastrointestinal tract, kidney, liver, lung, poorly/slowly perfused, well/rapidly perfused |       | Dennison, Bigelow and Andersen, 2004, Toxicol Ind Health, 20, 165-75 | 10.1191/0748233704th203oa    |
| <b>ethanol</b> |            | Oral bolus             | bone marrow, fat, gastrointestinal tract, kidney, liver, lung, poorly/slowly perfused, well/rapidly perfused |       | Dennison, Bigelow and Andersen, 2004, Toxicol Ind Health, 20, 165-75 | 10.1191/0748233704th203oa    |
| <b>ethanol</b> | Male/Adult | Inhalation             | brain, fat, liver, lung, poorly/slowly perfused, well/rapidly perfused                                       | acsIX | Dumas-Campagna et al., 2014, Inhal Toxicol, 26, 59-69                | 10.3109/08958378.2013.853714 |

|                |                  |                             |                                                                                  |                        |                                                                   |                              |
|----------------|------------------|-----------------------------|----------------------------------------------------------------------------------|------------------------|-------------------------------------------------------------------|------------------------------|
| <b>ethanol</b> | Female/adult     | Inhalation                  | brain, fat, liver, lung, poorly/slowly perfused, well/rapidly perfused           | acsIX                  | Dumas-Campagna et al., 2014, Inhal Toxicol, 26, 59-69             | 10.3109/08958378.2013.853714 |
| <b>Ethanol</b> |                  | Intravenous bolus injection |                                                                                  | PKQuest                | Levitt, 2002, BMC Clin Pharmacol, 2, 4                            | 10.1186/1472-6904-2-4        |
| <b>ethanol</b> |                  | Oral bolus                  |                                                                                  | PKQuest                | Levitt, 2002, BMC Clin Pharmacol, 2, 4                            | 10.1186/1472-6904-2-4        |
| <b>ethanol</b> |                  | Oral bolus                  | gut, liver, lung, muscle, stomach, well/rapidly perfused, poorly/slowly perfused | MATLAB                 | MacDonald et al, 2002, Regul Toxicol Pharmacol, 35, 165-76        | 10.1006/rtph.2001.1507       |
| <b>ethanol</b> | Male/From birth  | Inhalation                  | brain, fat, liver, lung, poorly/slowly perfused, well/rapidly perfused           | Multiple software used | Pastino et al., 1997, Toxicol Appl Pharmacol, 145, 147-57         | 10.1006/taap.1997.8161       |
| <b>ethanol</b> | Male/From birth  | Intravenous infusion        | brain, fat, liver, lung, poorly/slowly perfused, well/rapidly perfused           | Multiple software used | Pastino et al., 1997, Toxicol Appl Pharmacol, 145, 147-57         | 10.1006/taap.1997.8161       |
| <b>ethanol</b> | Male (Caucasian) | Inhalation                  | brain, fat, gastrointestinal tract, liver, lung, poorly/slowly                   |                        | Pastino, Flynn and Sultatos, 2000, Drug Chem Toxicol, 23, 179-201 | 10.1081/dct-100100110        |

|                |                               |                         |                                                                                                                  |  |                                                                            |                                    |
|----------------|-------------------------------|-------------------------|------------------------------------------------------------------------------------------------------------------|--|----------------------------------------------------------------------------|------------------------------------|
|                |                               |                         | perfused,<br>well/rapidly<br>perfused                                                                            |  |                                                                            |                                    |
| <b>ethanol</b> | Male<br>(African<br>American) | Inhalation              | brain, fat,<br>gastrointestinal tract,<br>liver, lung,<br>poorly/slowly<br>perfused,<br>well/rapidly<br>perfused |  | Pastino, Flynn and<br>Sultatos, 2000, Drug<br>Chem Toxicol, 23,<br>179-201 | 10.1081/dc<br>t-<br>100100110      |
| <b>ethanol</b> | Male<br>(Caucasian)           | Oral bolus              | brain, fat,<br>gastrointestinal tract,<br>liver, lung,<br>poorly/slowly<br>perfused,<br>well/rapidly<br>perfused |  | Pastino, Flynn and<br>Sultatos, 2000, Drug<br>Chem Toxicol, 23,<br>179-201 | 10.1081/dc<br>t-<br>100100110      |
| <b>ethanol</b> | Male<br>(African<br>American) | Oral bolus              | brain, fat,<br>gastrointestinal tract,<br>liver, lung,<br>poorly/slowly<br>perfused,<br>well/rapidly<br>perfused |  | Pastino, Flynn and<br>Sultatos, 2000, Drug<br>Chem Toxicol, 23,<br>179-201 | 10.1081/dc<br>t-<br>100100110      |
| <b>ethanol</b> |                               | Inhalation              |                                                                                                                  |  | Plawecki et al., 2007,<br>Biomed Signal<br>Process Control, 2,<br>97-110   | 10.1016/j.b<br>spc.2007.0<br>4.001 |
| <b>ethanol</b> | Male/Adult                    | Intravenous<br>infusion |                                                                                                                  |  | Ramchandani et al.,<br>2009, Alcohol Clin<br>Exp Res, 33, 938-44           | 10.1111/j.1<br>530-                |

|                  |                 |                             |                                                                                                        |                        |                                                               |                                  |
|------------------|-----------------|-----------------------------|--------------------------------------------------------------------------------------------------------|------------------------|---------------------------------------------------------------|----------------------------------|
|                  |                 |                             |                                                                                                        |                        |                                                               | 0277.2009.00906.x                |
| <b>ethanol</b>   | Female/adult    | Intravenous infusion        |                                                                                                        |                        | Ramchandani et al., 2009, Alcohol Clin Exp Res, 33, 938-44    | 10.1111/j.1530-0277.2009.00906.x |
| <b>fentanyl</b>  |                 | Intravenous infusion        | arterial, brain, carcass, fat, gut, heart, kidney, liver, lung, muscle, pancreas, skin, spleen, venous | MATLAB                 | Björkman, 2003, J Pharmacokinet Pharmacodyn, 30, 285-307      | 10.1023/a:1026194618660          |
| <b>fentanyl</b>  | Adult (typical) | Intravenous bolus injection |                                                                                                        | GastroPlus             | Cheng et al, 2019, ACS Chem Neurosci, 10, 3486-3499           | 10.1021/acscchemneuro.9b00109    |
| <b>fentanyl</b>  |                 | Intravenous bolus injection |                                                                                                        | MATLAB                 | Huang and Isoherranen, 2019, J Pharmacol Exp Ther, 372, 30-45 | 10.1124/jpet.119.262154          |
| <b>fentanyl</b>  |                 | Buccal                      |                                                                                                        | MATLAB                 | Huang and Isoherranen, 2019, J Pharmacol Exp Ther, 372, 30-45 | 10.1124/jpet.119.262154          |
| <b>methadone</b> | Female/pregnant | Oral bolus                  |                                                                                                        | Multiple software used | Ke et al., 2014, Br J Clin Pharmacol, 77, 554-70              | 10.1111/bcp.12207                |
| <b>methadone</b> |                 | Intravenous bolus injection | adipose, bone, brain, gastrointestinal tract, heart, kidney, liver, lung, marrow,                      | MATLAB                 | Yang et al., 2006, J Pharmacokinet Pharmacodyn, 33, 485-518   | 10.1007/s10928-006-9018-0        |

|                  |                    |                                   |                                                                                                                                          |        |                                                                                            |                                    |
|------------------|--------------------|-----------------------------------|------------------------------------------------------------------------------------------------------------------------------------------|--------|--------------------------------------------------------------------------------------------|------------------------------------|
|                  |                    |                                   | muscle, pancreas,<br>skin, spleen, thyroid                                                                                               |        |                                                                                            |                                    |
| <b>methadone</b> |                    | Oral bolus                        | adipose, bone, brain,<br>gastrointestinal tract,<br>heart, kidney, liver,<br>lung, marrow,<br>muscle, pancreas,<br>skin, spleen, thyroid | MATLAB | Yang et al., 2006, J<br>Pharmacokinet<br>Pharmacodyn, 33,<br>485-518                       | 10.1007/s1<br>0928-006-<br>9018-0  |
| <b>morphine</b>  | Adult<br>(typical) | Intravenous<br>bolus<br>injection |                                                                                                                                          | Simcyp | Emoto et al, 2017,<br>CPT<br>Pharmacometrics<br>Syst Pharmaacol, 6,<br>110-119             | 10.1002/ps<br>p4.12144             |
| <b>morphine</b>  | From birth         | Intravenous<br>bolus<br>injection |                                                                                                                                          | Simcyp | Emoto et al, 2017,<br>CPT<br>Pharmacometrics<br>Syst Pharmaacol, 6,<br>110-119             | 10.1002/ps<br>p4.12144             |
| <b>morphine</b>  | From birth         | Intravenous<br>bolus<br>injection |                                                                                                                                          | Simcyp | Emoto et al, 2018,<br>CPT<br>Pharmacometrics<br>Syst Pharmacol, 7,<br>464-473              | 10.1002/ps<br>p4.12306             |
| <b>morphine</b>  |                    | Intravenous<br>bolus<br>injection | lung, brain, muscle,<br>adipose, marrow,<br>intestine, spleen,<br>liver, kidney, arterial,<br>venous                                     |        | German, Pilvankar<br>and Przekwas, 2019,<br>J Pharmacokinet<br>Pharmacodyn, 46,<br>513-529 | 10.1007/s1<br>0928-019-<br>09648-1 |
| <b>morphine</b>  |                    | Intravenous<br>infusion           | lung, brain, muscle,<br>adipose, marrow,<br>intestine, spleen,                                                                           |        | German, Pilvankar<br>and Przekwas, 2019,<br>J Pharmacokinet                                | 10.1007/s1<br>0928-019-<br>09648-1 |

|                                |                 |                             |                                 |             |                                                                |                            |
|--------------------------------|-----------------|-----------------------------|---------------------------------|-------------|----------------------------------------------------------------|----------------------------|
|                                |                 |                             | liver, kidney, arterial, venous |             | Pharmacodyn, 46, 513-529                                       |                            |
| <b>morphine</b>                |                 | Intravenous bolus injection | liver                           | Simcyp      | Prasad et al., 2018, Drug Metab Dispos, 46, 943-952            | 10.1124/dmd.118.080523     |
| <b>morphine</b>                | From birth      | Intravenous bolus injection | liver                           | Simcyp      | Prasad et al., 2018, Drug Metab Dispos, 46, 943-952            | 10.1124/dmd.118.080523     |
| <b>morphine</b>                | Male/Adult      | Intravenous bolus injection |                                 | PK-Sim/MoBi | Schlender et al, 2016, Clin Pharmacokinet, 55, 1573-1589       | 10.1007/s40262-016-0422-3  |
| <b>morphine</b>                | Female/adult    | Intravenous bolus injection |                                 | PK-Sim/MoBi | Schlender et al, 2016, Clin Pharmacokinet, 55, 1573-1589       | 10.1007/s40262-016-0422-3  |
| <b>morphine</b>                | Male/old age    | Intravenous bolus injection |                                 | PK-Sim/MoBi | Schlender et al, 2016, Clin Pharmacokinet, 55, 1573-1589       | 10.1007/s40262-016-0422-3  |
| <b>morphine</b>                | Female/old age  | Intravenous bolus injection |                                 | PK-Sim/MoBi | Schlender et al, 2016, Clin Pharmacokinet, 55, 1573-1589       | 10.1007/s40262-016-0422-3  |
| <b>morphine</b>                | From birth      | Intravenous infusion        |                                 | PK-Sim/MoBi | Strougo et al., 2012, J Pharmacokinet Pharmacodyn, 39, 195-203 | 10.1007/s10928-012-9241-9  |
| <b>morphine</b>                | Adult (typical) | Intravenous infusion        | plasma, brain                   | NONMEM      | Yamamoto et al, 2018, Eur J Pharm Sci, 112, 168-179            | 10.1016/j.ejps.2017.11.011 |
| <b>N,O-didesmethyltramadol</b> | Adult (typical) | Intravenous bolus injection |                                 | Simcyp      | T'jollyn et al., 2015, Pharm Res, 32, 260-74                   | 10.1007/s11095-014-1460-x  |



|                            |                 |                             |                                                                                                                                             |             |                                                       |                                   |
|----------------------------|-----------------|-----------------------------|---------------------------------------------------------------------------------------------------------------------------------------------|-------------|-------------------------------------------------------|-----------------------------------|
| <b>N-desmethyltramadol</b> | Adult (typical) | Metabolism from parent      |                                                                                                                                             | Simcyp      | T'jollyn et al., 2015, Pharm Res, 32, 260-74          | 10.1007/s1095-014-1460-x          |
| <b>O-desmethyltramadol</b> | Adult (typical) | Metabolism from parent      |                                                                                                                                             | Simcyp      | T'jollyn et al., 2015, Pharm Res, 32, 260-74          | 10.1007/s1095-014-1460-x          |
| <b>oxycodone</b>           | Adult (typical) | Intravenous infusion        | plasma, brain                                                                                                                               | NONMEM      | Yamamoto et al, 2018, Eur J Pharm Sci, 112, 168-179   | 10.1016/j.ejps.2017.11.011        |
| <b>oxycodone</b>           | From birth      | Intravenous bolus injection |                                                                                                                                             | PK-Sim/MoBi | Zheng et al., 2019, Pharm Res, 36, 171                | 10.1007/s1095-019-2708-2          |
| <b>oxycodone</b>           | From birth      | Oral bolus                  |                                                                                                                                             | PK-Sim/MoBi | Zheng et al., 2019, Pharm Res, 36, 171                | 10.1007/s1095-019-2708-2          |
| <b>oxycodone</b>           | Male/Adult      | Intravenous bolus injection |                                                                                                                                             | PK-Sim/MoBi | Zheng et al., 2019, Pharm Res, 36, 171                | 10.1007/s1095-019-2708-2          |
| <b>oxycodone</b>           | Male/Adult      | Oral bolus                  |                                                                                                                                             | PK-Sim/MoBi | Zheng et al., 2019, Pharm Res, 36, 171                | 10.1007/s1095-019-2708-2          |
| <b>remifentanyl</b>        |                 | Intravenous infusion        | plasma, tissue, gastrointestinal tract small intestine, large intestine, gall bladder, liver, poorly/slowly perfused, well/rapidly perfused |             | Abbiati and Manca, 2017, Curr Drug Deliv, 14, 190-202 | 10.2174/1567201813666160524142031 |

|                     |                 |                             |                                                                                                         |                        |                                                  |                                                                               |
|---------------------|-----------------|-----------------------------|---------------------------------------------------------------------------------------------------------|------------------------|--------------------------------------------------|-------------------------------------------------------------------------------|
| <b>remifentanil</b> |                 | Intravenous infusion        | large intestine, small intestine, stomach, liver, plasma, poorly/slowly perfused, well/rapidly perfused | MATLAB                 | Cascone et al, 2018, Eur J Phar Sci, 111, 20-28  | 10.1016/j.ejps.2017.09.028                                                    |
| <b>remifentanil</b> |                 | Intravenous bolus injection | large intestine, small intestine, stomach, liver, plasma, poorly/slowly perfused, well/rapidly perfused | MATLAB                 | Cascone et al, 2018, Eur J Phar Sci, 111, 20-28  | 10.1016/j.ejps.2017.09.028                                                    |
| <b>R-methadone</b>  | Female/pregnant | Oral bolus                  |                                                                                                         | Multiple software used | Ke et al., 2014, Br J Clin Pharmacol, 77, 554-70 | 10.1111/bcp.12207                                                             |
| <b>S-methadone</b>  | Female/pregnant | Oral bolus                  |                                                                                                         | Multiple software used | Ke et al., 2014, Br J Clin Pharmacol, 77, 554-70 | 10.1111/bcp.12207                                                             |
| <b>sufentanil</b>   | Children        | Intravenous bolus injection |                                                                                                         | SimCyp                 | Zhou et al., 2018                                | <a href="https://doi.org/10.1002/cpt.904">https://doi.org/10.1002/cpt.904</a> |
| <b>sufentanil</b>   | Adult (typical) | Intravenous bolus injection |                                                                                                         | SimCyp                 | Zhou et al., 2018                                | <a href="https://doi.org/10.1002/cpt.905">https://doi.org/10.1002/cpt.905</a> |
| <b>tramadol</b>     | Adult (typical) | Intravenous bolus injection |                                                                                                         | Simcyp                 | T'Jollyn et al, 2015, AAPS J, 17, 1376-87        | 10.1208/s12248-015-9803-z                                                     |

|                 |                    |                                   |  |        |                                                    |                                   |
|-----------------|--------------------|-----------------------------------|--|--------|----------------------------------------------------|-----------------------------------|
| <b>tramadol</b> | Adult<br>(typical) | Intravenous<br>bolus<br>injection |  | Simcyp | Tjollyn et al., 2015,<br>Pharm Res, 32, 260-<br>74 | 10.1007/s1<br>1095-014-<br>1460-x |
|-----------------|--------------------|-----------------------------------|--|--------|----------------------------------------------------|-----------------------------------|
